# Supplementary material
Source: publisher site journal article supplement (https://www.dovepress.com/article/529532)
Supplement: Supplementary file 1 [file Supplementary%20figure%201_3.docx]

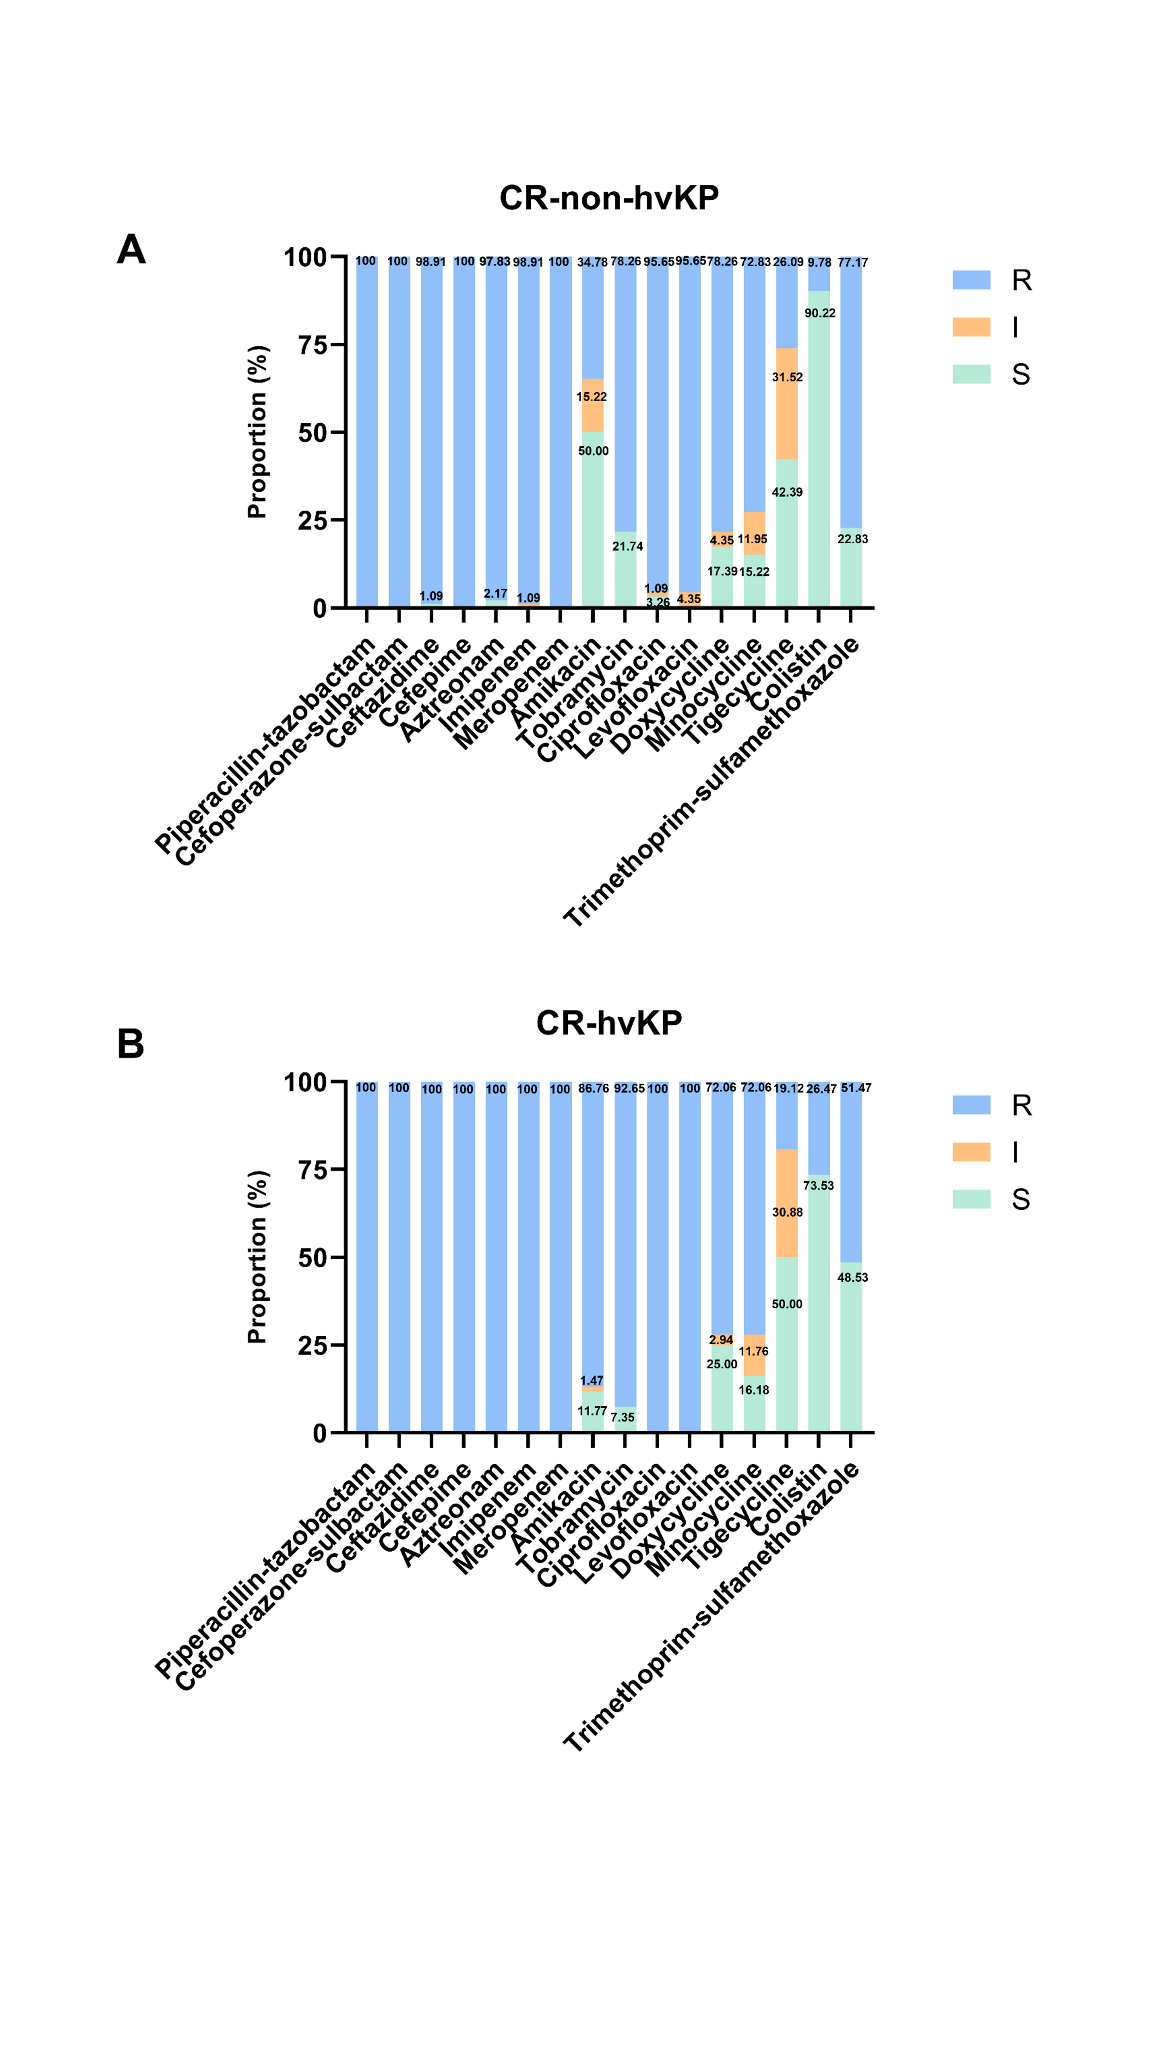


**Supplementary figure 1** Susceptible rate, intermediate rate, and resistant rate of CR-non-hvKP (A) and CR-hvKP (B) isolates.

**Abbreviations:** CR-hvKP, carbapenem-resistant hypervirulent *Klebsiella pneumoniae*; CR-non-hvKP, carbapenem-resistant non-hypervirulent *Klebsiella pneumoniae*; R, resistant; I, intermediate; S, susceptible.
